# Supplementary material for: Facile synthesis of magnetic intelligent sensors for the pH-sensitive controlled capture of Cr(vi)
Source: Royal Society of Chemistry journal article supplement (doi:10.1039/d4ra02695k), 2024-01-01
Supplement: d4ra02695k1.pdf [file d4ra02695k1.pdf]

Supplementary Material for

## Facile synthesis of magnetic intelligent sensors for pH-sensitive controlled capture of Cr(VI)

Peixin Hu<sup>a</sup>, Hechao Lu<sup>a</sup>, Qinting He<sup>a</sup>, Fang Ren<sup>a</sup>, Juan Wu<sup>a,b\*</sup>, Wei Jiang<sup>b</sup>

<sup>a</sup> Jiangsu Key Laboratory of E-waste Recycling, School of Resources and Environmental Engineering,  
Jiangsu University of Technology, Changzhou 213001, China

<sup>b</sup> National Special Superfine Powder Engineering Research Center, Nanjing University of Science and  
Technology, Nanjing 210094, China

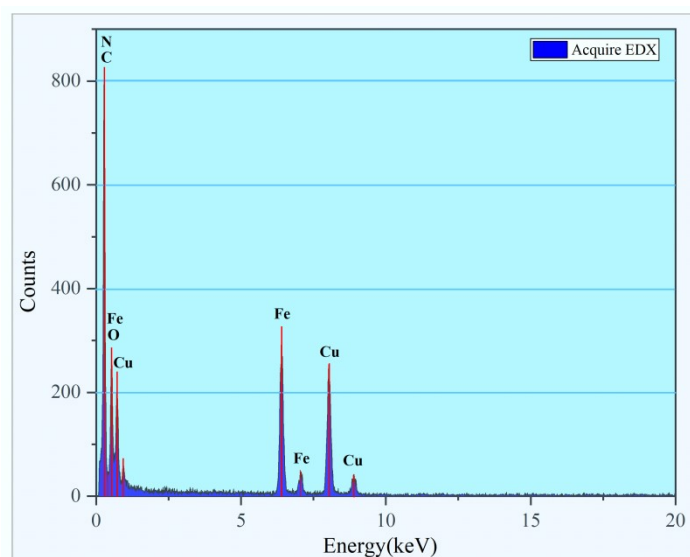

Fig. SI EDS spectra of Fe<sub>3</sub>O<sub>4</sub>/RhB@PAM nanosensors.

---

\* Corresponding author. Tel.: +86-18906110982

E-mail address: jintanwujuan@163.com

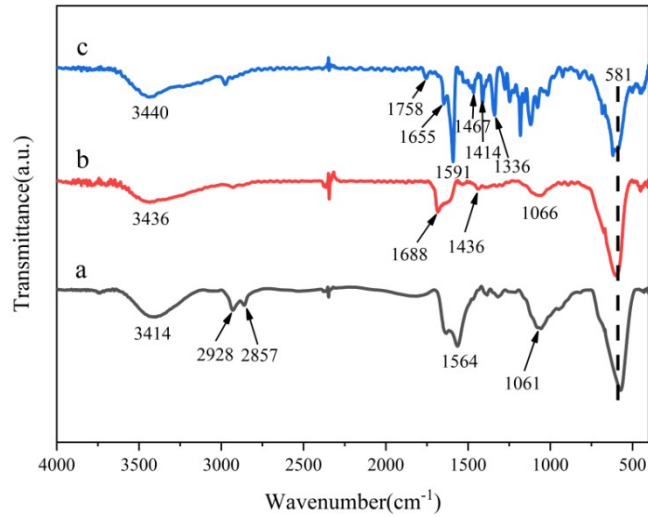

Fig. S2 FT-IR spectra of (a)  $\text{Fe}_3\text{O}_4\text{-NH}_2$ , (b)  $\text{Fe}_3\text{O}_4\text{-COOH}$  and (c)  $\text{Fe}_3\text{O}_4/\text{RhB@PAM}$ .

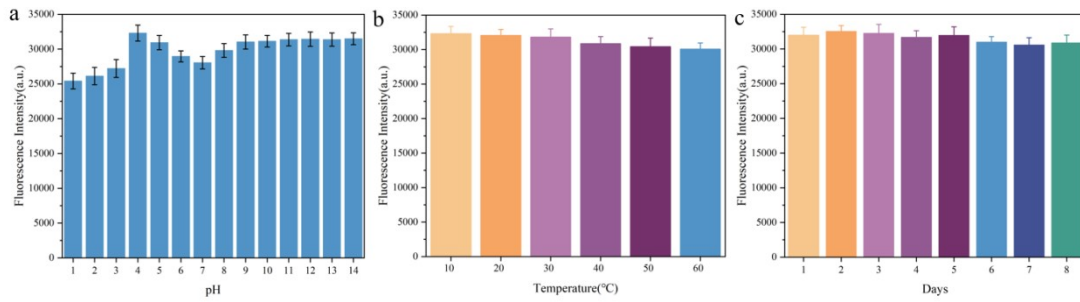

Fig. S3 Fluorescence intensities of the  $\text{Fe}_3\text{O}_4/\text{RhB@PAM}$  sensors at different (a) pH, (b) temperature and (c) storage time. The excitation and emission wavelengths were 554 nm and 582 nm, respectively. Slit: 2.0 nm/2.0 nm.

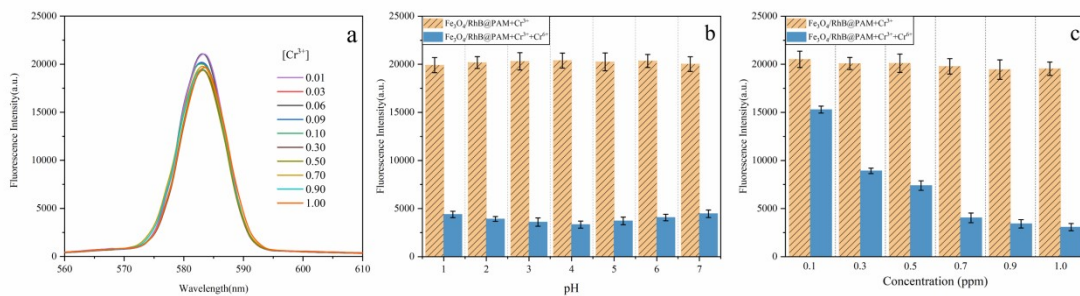

Fig. S4 (a) Fluorescence spectra of  $\text{Fe}_3\text{O}_4/\text{RhB@PAM}$  after addition of different amounts of  $\text{Cr(III)}$  in aqueous solution (pH 4), (b) the fluorescence intensities of  $\text{Fe}_3\text{O}_4/\text{RhB@PAM}$  sensors with  $\text{Cr(III)}$  (0.9 ppm) and  $\text{Cr(III)+Cr(VI)}$  (0.9 ppm) at different pH values and (c) the fluorescence intensities of  $\text{Fe}_3\text{O}_4/\text{RhB@PAM}$  sensors with  $\text{Cr(III)}$  (0.9 ppm) and  $\text{Cr(III)+Cr(VI)}$  (0.9 ppm) at different concentrations.

fluorescence intensities of  $\text{Fe}_3\text{O}_4/\text{RhB}@PAM$  sensors with  $\text{Cr(III)}$  and  $\text{Cr(III)+Cr(VI)}$  at different concentrations (the concentrations of  $\text{Cr(VI)}$  and  $\text{Cr(III)}$  are the same). The excitation and emission wavelengths were 554 nm and 582 nm, respectively. Slit: 2.0 nm/2.0 nm.

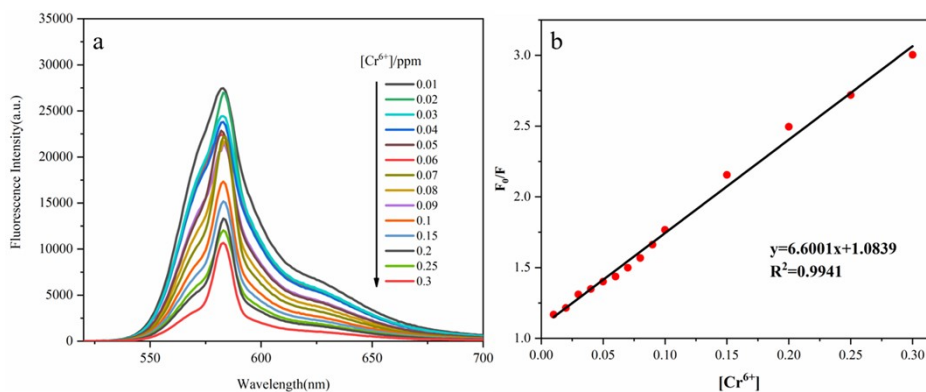

Fig. S5 (a) Fluorescence spectra of RhB after addition of different amounts of  $\text{Cr(VI)}$  in aqueous solution (pH 4) and (b) plot of the fluorescence intensity versus various concentrations of  $\text{Cr(VI)}$ .  $F_0$  is the fluorescence intensity of RhB,  $F$  is the obtained fluorescence intensity after addition of  $\text{Cr(VI)}$ . The excitation and emission wavelengths were 554 nm and 582 nm, respectively. Slit: 2.0 nm/2.0 nm.
